## CORRECTION

# Correction: An anterior signaling center patterns and sizes the anterior neuroectoderm of the sea urchin embryo

Ryan C. Range and Zheng Wei

There was an error published in *Development* **143**, 1523-1533.

The author affiliations should have been listed as follows.

Ryan C. Range<sup>1,2</sup> and Zheng Wei<sup>2</sup>

<sup>1</sup>Department of Biological Sciences, Mississippi State University, Mississippi State, MS 39762, USA. <sup>2</sup>National Institute of Dental and Craniofacial Research, National Institutes of Health, Bethesda, MD 20892, USA.

We apologise to the authors and readers for this mistake.
